# Supplementary material for: Differing responses of red abalone (Haliotis rufescens) and white abalone (H. sorenseni) to infection with phage-associated Candidatus Xenohaliotis californiensis
Source: PeerJ. 2018 Jun 25;6:e5104. doi: 10.7717/peerj.5104 (PMC6022723; doi:10.7717/peerj.5104)
Supplement: Data S1 [file peerj-06-5104-s002.csv]

AnimalID	Day	Event	Tank	Group	Temp	Species	Pool
1	161	0	1	Exposed	Heated	White	10
2	153	1	1	Exposed	Heated	White	10
3	153	1	1	Exposed	Heated	White	10
4	157	1	1	Exposed	Heated	White	10
5	183	1	1	Exposed	Heated	White	10
6	161	0	1	Exposed	Heated	White	10
7	161	0	1	Exposed	Heated	White	10
8	0	0	1	Exposed	Heated	White	11
9	138	1	2	Exposed	Heated	White	10
10	143	1	2	Exposed	Heated	White	10
11	143	1	2	Exposed	Heated	White	10
12	153	1	2	Exposed	Heated	White	10
13	161	0	2	Exposed	Heated	White	10
14	149	1	2	Exposed	Heated	White	10
15	161	0	2	Exposed	Heated	White	10
16	0	0	2	Exposed	Heated	White	10
17	126	1	3	Exposed	Heated	White	10
18	126	1	3	Exposed	Heated	White	10
19	113	1	3	Exposed	Heated	White	10
20	161	0	3	Exposed	Heated	White	10
21	161	0	3	Exposed	Heated	White	10
22	143	1	3	Exposed	Heated	White	10
23	143	1	3	Exposed	Heated	White	10
24	138	1	3	Exposed	Heated	White	10
25	161	0	4	Exposed	Heated	White	10
26	157	1	4	Exposed	Heated	White	10
27	157	1	4	Exposed	Heated	White	10
28	153	1	4	Exposed	Heated	White	10
29	62	1	4	Exposed	Heated	White	10
30	149	1	4	Exposed	Heated	White	10
31	138	1	4	Exposed	Heated	White	10
32	126	1	4	Exposed	Heated	White	10
33	161	0	5	Exposed	Heated	White	9
34	161	1	5	Exposed	Heated	White	9
35	195	1	5	Exposed	Heated	White	9
36	231	1	5	Exposed	Heated	White	9
37	113	1	5	Exposed	Heated	White	9
38	62	1	5	Exposed	Heated	White	9
39	149	1	5	Exposed	Heated	White	9
40	0	0	5	Exposed	Heated	White	9
41	161	0	6	Exposed	Heated	Red	12
42	62	1	6	Exposed	Heated	Red	12
43	161	0	6	Exposed	Heated	Red	12
44	343	0	6	Exposed	Heated	Red	12
45	343	0	6	Exposed	Heated	Red	12
46	343	0	6	Exposed	Heated	Red	12
47	343	0	6	Exposed	Heated	Red	12
48	343	0	6	Exposed	Heated	Red	12
49	343	0	7	Exposed	Heated	Red	12
50	161	0	7	Exposed	Heated	Red	12
51	161	0	7	Exposed	Heated	Red	12
52	343	0	7	Exposed	Heated	Red	12
53	62	1	7	Exposed	Heated	Red	12
54	343	0	7	Exposed	Heated	Red	12
55	343	0	7	Exposed	Heated	Red	12
56	343	0	7	Exposed	Heated	Red	12
57	143	1	8	Exposed	Heated	White	9
58	157	1	8	Exposed	Heated	White	9
59	149	1	8	Exposed	Heated	White	9
60	161	1	8	Exposed	Heated	White	9
61	220	1	8	Exposed	Heated	White	9
62	161	0	8	Exposed	Heated	White	9
63	143	1	8	Exposed	Heated	White	9
64	126	1	8	Exposed	Heated	White	9
65	329	1	9	Exposed	Heated	Red	12
66	343	0	9	Exposed	Heated	Red	12
67	343	0	9	Exposed	Heated	Red	12
68	161	0	9	Exposed	Heated	Red	12
69	343	0	9	Exposed	Heated	Red	12
70	343	0	9	Exposed	Heated	Red	12
71	161	0	9	Exposed	Heated	Red	12
72	343	0	9	Exposed	Heated	Red	12
73	343	0	10	Exposed	Heated	Red	12
74	161	0	10	Exposed	Heated	Red	12
75	161	0	10	Exposed	Heated	Red	12
76	343	0	10	Exposed	Heated	Red	12
77	343	0	10	Exposed	Heated	Red	12
78	343	0	10	Exposed	Heated	Red	12
79	343	0	10	Exposed	Heated	Red	12
80	0	0	11	Exposed	Heated	Red	11
81	223	1	10	Exposed	Heated	Red	12
82	343	0	11	Exposed	Heated	Red	11
83	343	0	11	Exposed	Heated	Red	11
84	343	0	11	Exposed	Heated	Red	11
85	343	0	11	Exposed	Heated	Red	11
86	343	0	11	Exposed	Heated	Red	11
87	161	0	11	Exposed	Heated	Red	11
88	161	0	11	Exposed	Heated	Red	11
89	161	0	12	Exposed	Heated	Red	11
90	343	0	12	Exposed	Heated	Red	11
91	343	0	12	Exposed	Heated	Red	11
92	343	0	12	Exposed	Heated	Red	11
93	161	0	12	Exposed	Heated	Red	11
94	343	0	12	Exposed	Heated	Red	11
95	343	0	12	Exposed	Heated	Red	11
96	343	0	12	Exposed	Heated	Red	11
97	343	0	13	Exposed	Heated	Red	11
98	161	0	13	Exposed	Heated	Red	11
99	126	1	13	Exposed	Heated	Red	11
100	329	1	13	Exposed	Heated	Red	11
101	340	1	13	Exposed	Heated	Red	11
102	343	0	13	Exposed	Heated	Red	11
103	161	0	13	Exposed	Heated	Red	11
104	336	1	13	Exposed	Heated	Red	11
105	149	1	14	Exposed	Heated	White	9
106	161	0	14	Exposed	Heated	White	9
107	183	1	14	Exposed	Heated	White	9
108	251	1	14	Exposed	Heated	White	9
109	161	1	14	Exposed	Heated	White	9
110	161	0	14	Exposed	Heated	White	9
111	0	0	14	Exposed	Heated	White	9
112	0	0	14	Exposed	Heated	White	9
113	294	1	15	Exposed	Heated	Red	11
114	336	1	15	Exposed	Heated	Red	11
115	336	1	15	Exposed	Heated	Red	11
116	340	1	15	Exposed	Heated	Red	11
117	161	0	15	Exposed	Heated	Red	11
118	343	0	15	Exposed	Heated	Red	11
119	343	0	15	Exposed	Heated	Red	11
120	343	0	15	Exposed	Heated	Red	11
121	195	1	16	Exposed	Heated	White	9
122	161	1	16	Exposed	Heated	White	9
123	161	0	16	Exposed	Heated	White	9
124	149	1	16	Exposed	Heated	White	9
125	136	1	16	Exposed	Heated	White	9
126	161	0	16	Exposed	Heated	White	9
127	136	1	16	Exposed	Heated	White	9
128	136	1	16	Exposed	Heated	White	9
129	161	0	17	Exposed	Ambient	White	6
130	178	1	17	Exposed	Ambient	White	6
131	343	0	17	Exposed	Ambient	White	6
132	161	0	17	Exposed	Ambient	White	6
133	161	0	17	Exposed	Ambient	White	6
134	153	1	17	Exposed	Ambient	White	6
135	113	1	17	Exposed	Ambient	White	6
136	0	0	17	Exposed	Ambient	White	6
137	251	1	18	Exposed	Ambient	White	6
138	251	1	18	Exposed	Ambient	White	6
139	343	0	18	Exposed	Ambient	White	6
140	183	1	18	Exposed	Ambient	White	6
141	113	1	18	Exposed	Ambient	White	6
142	161	0	18	Exposed	Ambient	White	6
143	161	0	18	Exposed	Ambient	White	6
144	343	0	18	Exposed	Ambient	White	6
145	188	1	19	Exposed	Ambient	Red	8
146	161	0	19	Exposed	Ambient	Red	8
147	161	1	19	Exposed	Ambient	Red	8
148	343	0	19	Exposed	Ambient	Red	8
149	343	0	19	Exposed	Ambient	Red	8
150	343	0	19	Exposed	Ambient	Red	8
151	343	0	19	Exposed	Ambient	Red	8
152	343	0	19	Exposed	Ambient	Red	8
153	161	0	20	Exposed	Ambient	Red	8
154	343	0	20	Exposed	Ambient	Red	8
155	343	0	20	Exposed	Ambient	Red	8
156	343	0	20	Exposed	Ambient	Red	8
157	343	0	20	Exposed	Ambient	Red	8
158	161	0	20	Exposed	Ambient	Red	8
159	343	0	20	Exposed	Ambient	Red	8
160	343	0	20	Exposed	Ambient	Red	8
161	343	0	21	Exposed	Ambient	Red	8
162	343	0	21	Exposed	Ambient	Red	8
163	343	0	21	Exposed	Ambient	Red	8
164	343	0	21	Exposed	Ambient	Red	8
165	161	0	21	Exposed	Ambient	Red	8
166	343	0	21	Exposed	Ambient	Red	8
167	161	0	21	Exposed	Ambient	Red	8
168	343	0	21	Exposed	Ambient	Red	8
169	161	0	22	Exposed	Ambient	White	6
170	272	1	22	Exposed	Ambient	White	6
171	161	0	22	Exposed	Ambient	White	6
172	234	1	22	Exposed	Ambient	White	6
173	178	1	22	Exposed	Ambient	White	6
174	343	0	22	Exposed	Ambient	White	6
175	161	0	22	Exposed	Ambient	White	6
176	0	0	22	Exposed	Ambient	White	6
177	161	0	23	Exposed	Ambient	Red	8
178	241	1	23	Exposed	Ambient	Red	8
179	343	0	23	Exposed	Ambient	Red	8
180	343	0	23	Exposed	Ambient	Red	8
181	343	0	23	Exposed	Ambient	Red	8
182	343	0	23	Exposed	Ambient	Red	8
183	343	0	23	Exposed	Ambient	Red	8
184	343	0	23	Exposed	Ambient	Red	8
185	343	0	24	Exposed	Ambient	Red	7
186	343	0	24	Exposed	Ambient	Red	7
187	161	0	24	Exposed	Ambient	Red	7
188	343	0	24	Exposed	Ambient	Red	7
189	343	0	24	Exposed	Ambient	Red	7
190	161	0	24	Exposed	Ambient	Red	7
191	343	0	24	Exposed	Ambient	Red	7
192	343	0	24	Exposed	Ambient	Red	7
193	270	1	25	Exposed	Ambient	White	6
194	161	0	25	Exposed	Ambient	White	6
195	161	0	25	Exposed	Ambient	White	6
196	343	0	25	Exposed	Ambient	White	6
197	343	0	25	Exposed	Ambient	White	6
198	241	1	25	Exposed	Ambient	White	6
199	343	0	25	Exposed	Ambient	White	6
200	343	0	25	Exposed	Ambient	White	6
201	343	0	26	Exposed	Ambient	Red	7
202	343	0	26	Exposed	Ambient	Red	7
203	343	0	26	Exposed	Ambient	Red	7
204	343	0	26	Exposed	Ambient	Red	7
205	161	0	26	Exposed	Ambient	Red	7
206	343	0	26	Exposed	Ambient	Red	7
207	161	0	26	Exposed	Ambient	Red	7
208	340	1	26	Exposed	Ambient	Red	7
209	343	0	27	Exposed	Ambient	Red	7
210	343	0	27	Exposed	Ambient	Red	7
211	343	0	27	Exposed	Ambient	Red	7
212	343	0	27	Exposed	Ambient	Red	7
213	343	0	27	Exposed	Ambient	Red	7
214	343	0	27	Exposed	Ambient	Red	7
215	161	0	27	Exposed	Ambient	Red	7
216	161	0	27	Exposed	Ambient	Red	7
217	195	1	28	Exposed	Ambient	White	5
218	161	0	28	Exposed	Ambient	White	5
219	259	1	28	Exposed	Ambient	White	5
220	178	1	28	Exposed	Ambient	White	5
221	183	1	28	Exposed	Ambient	White	5
222	183	1	28	Exposed	Ambient	White	5
223	161	0	28	Exposed	Ambient	White	5
224	343	0	28	Exposed	Ambient	White	5
225	343	0	29	Exposed	Ambient	Red	7
226	343	0	29	Exposed	Ambient	Red	7
227	343	0	29	Exposed	Ambient	Red	7
228	343	0	29	Exposed	Ambient	Red	7
229	343	0	29	Exposed	Ambient	Red	7
230	343	0	29	Exposed	Ambient	Red	7
231	161	0	29	Exposed	Ambient	Red	7
232	161	0	29	Exposed	Ambient	Red	7
233	265	1	30	Exposed	Ambient	White	5
234	264	1	30	Exposed	Ambient	White	5
235	161	0	30	Exposed	Ambient	White	5
236	343	0	30	Exposed	Ambient	White	5
237	161	0	30	Exposed	Ambient	White	5
238	343	0	30	Exposed	Ambient	White	5
239	343	0	30	Exposed	Ambient	White	5
240	0	0	30	Exposed	Ambient	White	5
241	178	1	31	Exposed	Ambient	White	5
242	251	1	31	Exposed	Ambient	White	5
243	161	0	31	Exposed	Ambient	White	5
244	161	0	31	Exposed	Ambient	White	5
245	343	0	31	Exposed	Ambient	White	5
246	343	0	31	Exposed	Ambient	White	5
247	343	0	31	Exposed	Ambient	White	5
248	0	0	31	Exposed	Ambient	White	5
249	136	1	32	Exposed	Ambient	White	5
250	343	0	32	Exposed	Ambient	White	5
251	343	0	32	Exposed	Ambient	White	5
252	161	0	32	Exposed	Ambient	White	5
253	161	0	32	Exposed	Ambient	White	5
254	343	0	32	Exposed	Ambient	White	5
255	161	0	32	Exposed	Ambient	White	5
256	0	0	32	Exposed	Ambient	White	5
257	62	1	33	Unexposed	Heated	Red	4
258	343	0	33	Unexposed	Heated	Red	4
259	343	0	33	Unexposed	Heated	Red	4
260	343	0	33	Unexposed	Heated	Red	4
261	343	0	33	Unexposed	Heated	Red	4
262	343	0	33	Unexposed	Heated	Red	4
263	161	0	33	Unexposed	Heated	Red	4
264	161	0	33	Unexposed	Heated	Red	4
265	165	1	34	Unexposed	Heated	White	2
266	284	1	34	Unexposed	Heated	White	2
267	202	1	34	Unexposed	Heated	White	2
268	124	1	34	Unexposed	Heated	White	2
269	161	0	34	Unexposed	Heated	White	2
270	343	0	34	Unexposed	Heated	White	2
271	343	0	34	Unexposed	Heated	White	2
272	161	0	34	Unexposed	Heated	White	2
273	126	1	35	Unexposed	Heated	White	2
274	195	1	35	Unexposed	Heated	White	2
275	202	1	35	Unexposed	Heated	White	2
276	161	0	35	Unexposed	Heated	White	2
277	161	0	35	Unexposed	Heated	White	2
278	343	0	35	Unexposed	Heated	White	2
279	325	1	35	Unexposed	Heated	White	2
280	343	0	35	Unexposed	Heated	White	2
281	343	0	36	Unexposed	Heated	White	2
282	343	0	36	Unexposed	Heated	White	2
283	161	0	36	Unexposed	Heated	White	2
284	343	0	36	Unexposed	Heated	White	2
285	124	1	36	Unexposed	Heated	White	2
286	183	1	36	Unexposed	Heated	White	2
287	161	0	36	Unexposed	Heated	White	2
288	62	1	36	Unexposed	Heated	White	2
289	175	1	37	Unexposed	Heated	White	2
290	161	0	37	Unexposed	Heated	White	2
291	325	1	37	Unexposed	Heated	White	2
292	153	1	37	Unexposed	Heated	White	2
293	153	1	37	Unexposed	Heated	White	2
294	343	0	37	Unexposed	Heated	White	2
295	161	0	37	Unexposed	Heated	White	2
296	0	0	37	Unexposed	Heated	White	2
297	161	0	38	Unexposed	Heated	Red	4
298	161	0	38	Unexposed	Heated	Red	4
299	343	0	38	Unexposed	Heated	Red	4
300	343	0	38	Unexposed	Heated	Red	4
301	343	0	38	Unexposed	Heated	Red	4
302	343	0	38	Unexposed	Heated	Red	4
303	343	0	38	Unexposed	Heated	Red	4
304	343	0	38	Unexposed	Heated	Red	4
305	343	0	39	Unexposed	Heated	White	1
306	343	0	39	Unexposed	Heated	White	1
307	244	1	39	Unexposed	Heated	White	1
308	175	1	39	Unexposed	Heated	White	1
309	325	1	39	Unexposed	Heated	White	1
310	161	0	39	Unexposed	Heated	White	1
311	161	0	39	Unexposed	Heated	White	1
312	223	1	39	Unexposed	Heated	White	1
313	343	0	40	Unexposed	Heated	Red	4
314	343	0	40	Unexposed	Heated	Red	4
315	343	0	40	Unexposed	Heated	Red	4
316	343	0	40	Unexposed	Heated	Red	4
317	343	0	40	Unexposed	Heated	Red	4
318	161	0	40	Unexposed	Heated	Red	4
319	161	0	40	Unexposed	Heated	Red	4
320	343	0	40	Unexposed	Heated	Red	4
321	343	0	41	Unexposed	Heated	White	1
322	259	1	41	Unexposed	Heated	White	1
323	343	0	41	Unexposed	Heated	White	1
324	251	1	41	Unexposed	Heated	White	1
325	259	1	41	Unexposed	Heated	White	1
326	161	0	41	Unexposed	Heated	White	1
327	161	0	41	Unexposed	Heated	White	1
328	0	0	41	Unexposed	Heated	White	1
329	161	0	42	Unexposed	Heated	White	1
330	161	0	42	Unexposed	Heated	White	1
331	183	1	42	Unexposed	Heated	White	1
332	343	0	42	Unexposed	Heated	White	1
333	343	0	42	Unexposed	Heated	White	1
334	343	0	42	Unexposed	Heated	White	1
335	343	0	42	Unexposed	Heated	White	1
336	343	0	42	Unexposed	Heated	White	1
337	343	0	43	Unexposed	Heated	Red	4
338	343	0	43	Unexposed	Heated	Red	4
339	343	0	43	Unexposed	Heated	Red	4
340	161	0	43	Unexposed	Heated	Red	4
341	161	0	43	Unexposed	Heated	Red	4
342	343	0	43	Unexposed	Heated	Red	4
343	0	0	43	Unexposed	Heated	Red	4
344	0	0	43	Unexposed	Heated	Red	4
345	343	0	44	Unexposed	Heated	Red	3
346	161	0	44	Unexposed	Heated	Red	3
347	343	0	44	Unexposed	Heated	Red	3
348	343	0	44	Unexposed	Heated	Red	3
349	343	0	44	Unexposed	Heated	Red	3
350	343	0	44	Unexposed	Heated	Red	3
351	161	0	44	Unexposed	Heated	Red	3
352	343	0	44	Unexposed	Heated	Red	3
353	343	0	45	Unexposed	Heated	Red	3
354	161	0	45	Unexposed	Heated	Red	3
355	161	0	45	Unexposed	Heated	Red	3
356	343	0	45	Unexposed	Heated	Red	3
357	343	0	45	Unexposed	Heated	Red	3
358	343	0	45	Unexposed	Heated	Red	3
359	343	0	45	Unexposed	Heated	Red	3
360	343	0	45	Unexposed	Heated	Red	3
361	161	0	46	Unexposed	Heated	Red	3
362	161	0	46	Unexposed	Heated	Red	3
363	343	0	46	Unexposed	Heated	Red	3
364	343	0	46	Unexposed	Heated	Red	3
365	343	0	46	Unexposed	Heated	Red	3
366	343	0	46	Unexposed	Heated	Red	3
367	343	0	46	Unexposed	Heated	Red	3
368	343	0	46	Unexposed	Heated	Red	3
369	161	0	47	Unexposed	Heated	Red	3
370	161	0	47	Unexposed	Heated	Red	3
371	343	0	47	Unexposed	Heated	Red	3
372	343	0	47	Unexposed	Heated	Red	3
373	343	0	47	Unexposed	Heated	Red	3
374	343	0	47	Unexposed	Heated	Red	3
375	343	0	47	Unexposed	Heated	Red	3
376	343	0	47	Unexposed	Heated	Red	3
377	343	0	48	Unexposed	Heated	White	1
378	343	0	48	Unexposed	Heated	White	1
379	202	1	48	Unexposed	Heated	White	1
380	161	0	48	Unexposed	Heated	White	1
381	161	0	48	Unexposed	Heated	White	1
382	231	1	48	Unexposed	Heated	White	1
383	202	1	48	Unexposed	Heated	White	1
384	0	0	48	Unexposed	Heated	White	1
